# Supplementary material
Source: MDPI journal article supplement (https://www.mdpi.com/2306-5710/10/1/13)
Supplement: s1 [file s1 › beverages-2776655-supplementary.pdf]

# **Investigation on Xinomavro Red Wines Aging with Various Wood Chips using Pulsed Electric Field**

**Artemis K. Toulaki <sup>1</sup>, Vassilis Athanasiadis <sup>2</sup>, Theodoros Chatzimitakos <sup>2</sup>, Dimitrios Kalompatsios <sup>2</sup>, Eleni Bozinou <sup>2</sup>, Kosmas Roufas <sup>2</sup>, George I. Mantanis <sup>3</sup>, Vassilis G. Dourtoglou <sup>1</sup> and Stavros I. Lalas <sup>2,\*</sup>**

<sup>1</sup> Department of Wine, Vine and Beverage Sciences, University of West Attica, Agiou Spyridonos str., 12210, Egaleo, Athens, Greece; info@wineconsulting.gr (A.K.T); vdourt@uniwa.gr (V.G.D.)

<sup>2</sup> Department of Food Science and Nutrition, University of Thessaly, Terma N. Temponera Street, 43100 Karditsa, Greece; vaathanasiadis@uth.gr (V.A.); tchatzimitakos@uth.gr (T.C.); dkalompatsios@uth.gr (D.K.); empouzinou@uth.gr (E.B.); k.roufas@pdm.gov.gr (K.R.)

<sup>3</sup> Lab of Wood Science and Technology, Department of Forestry, Wood Sciences and Design, University of Thessaly, Griva 11, 43100 Karditsa, Greece; mantanis@uth.gr

\* Correspondence: slalas@uth.gr; Tel.: +30-24410-64783

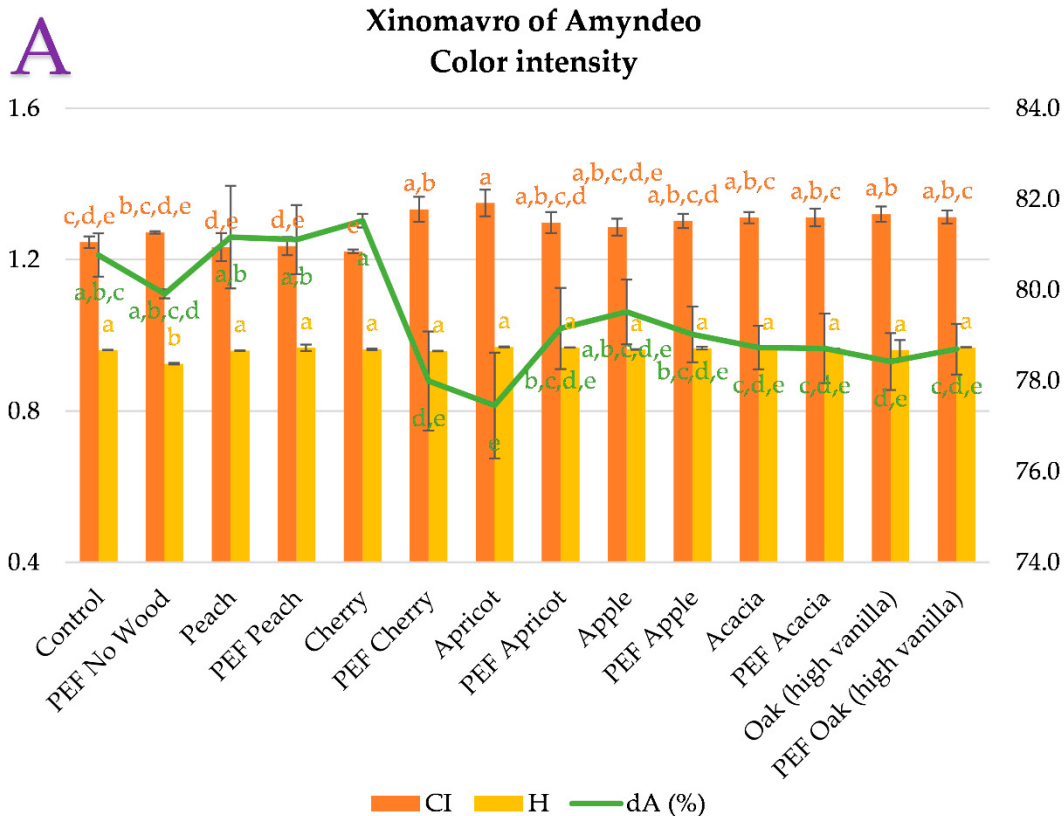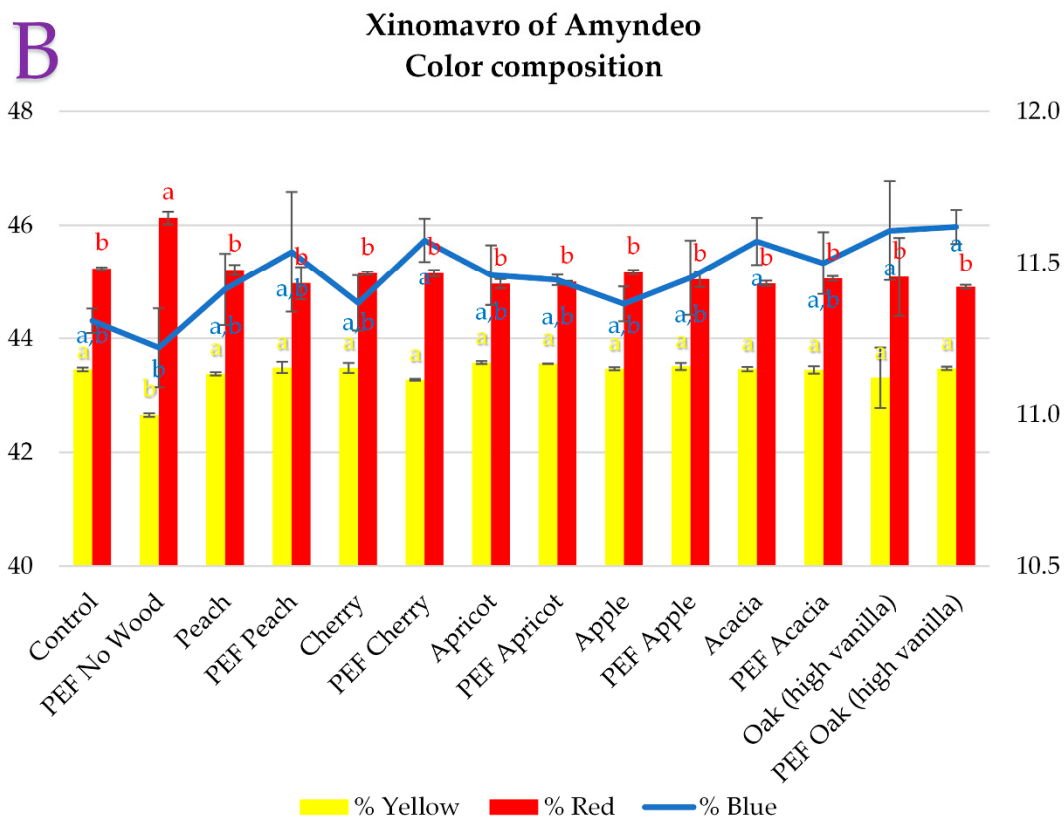

**Figure S1.** Amyndeo Xinomavro wine color intensity (CI), hue (H), and wine brilliance (dA, %) are displayed in plot A, and the color composition is presented in plot B. Values of bars are denoted on left axis and values of line are denoted on the right axis.

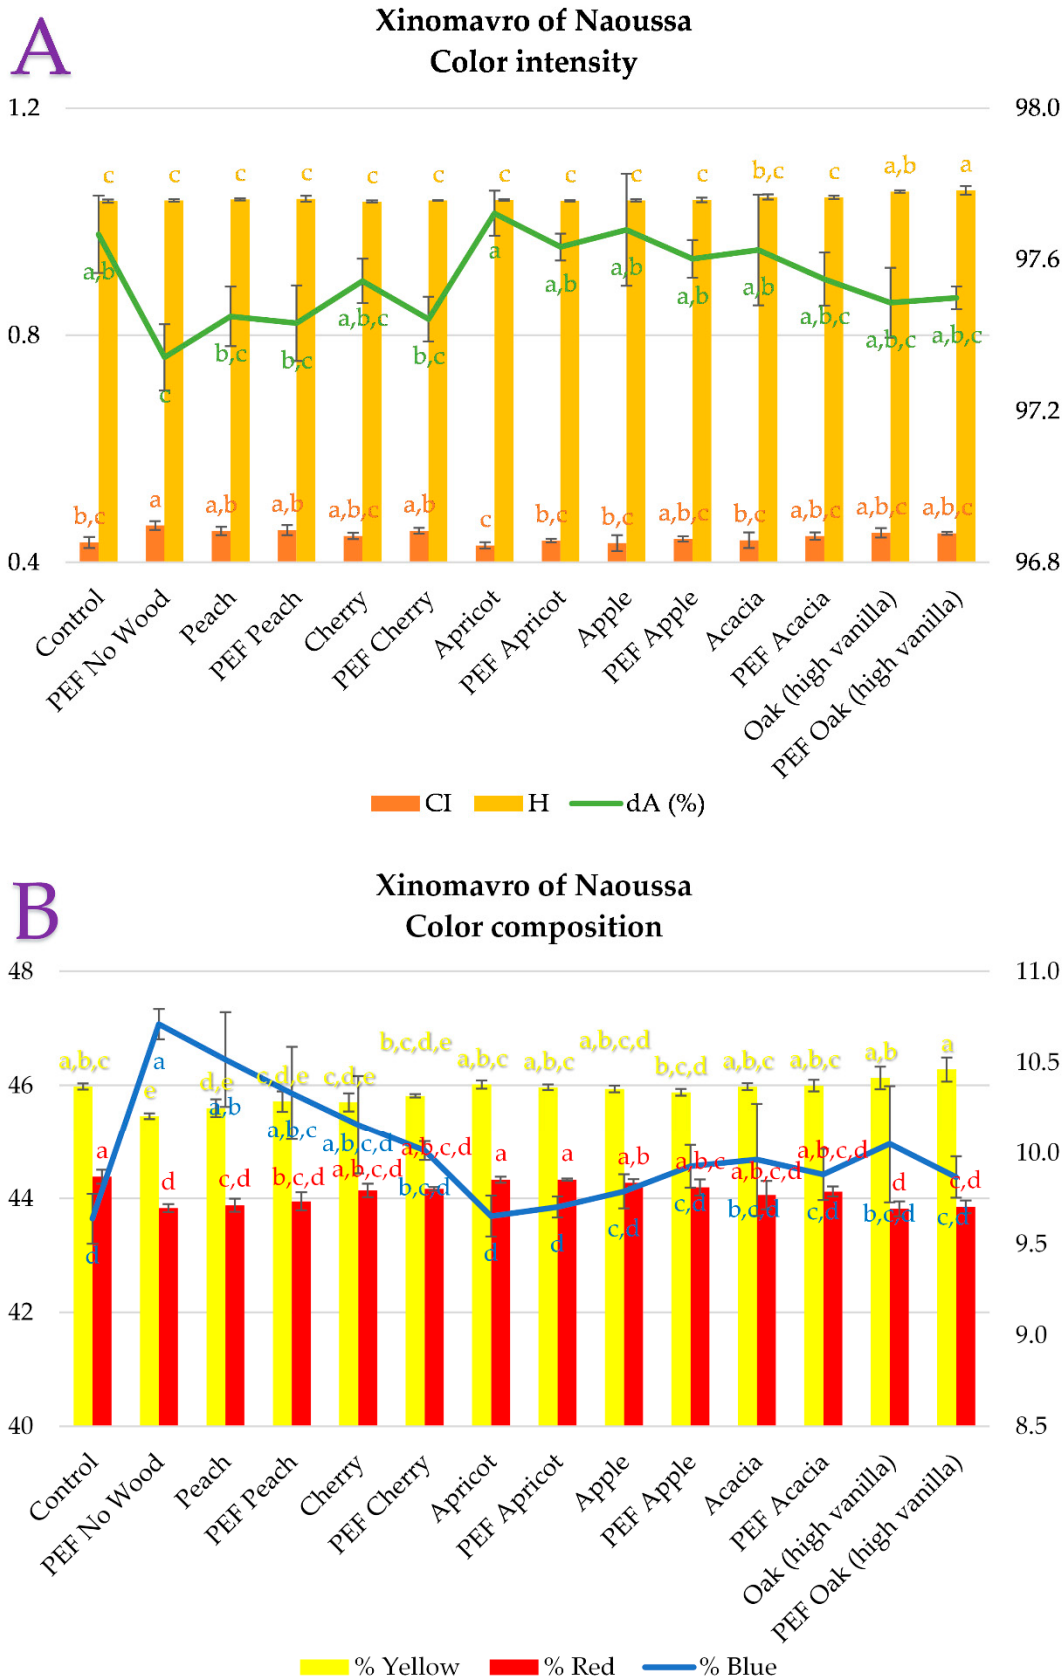

**Figure S2.** Naoussa Xinomavro wine color intensity (CI), hue (H), and wine brilliance (dA, %) are displayed in plot A, and the color composition is presented in plot B. Values of bars are denoted on left axis and values of line are denoted on the right axis.

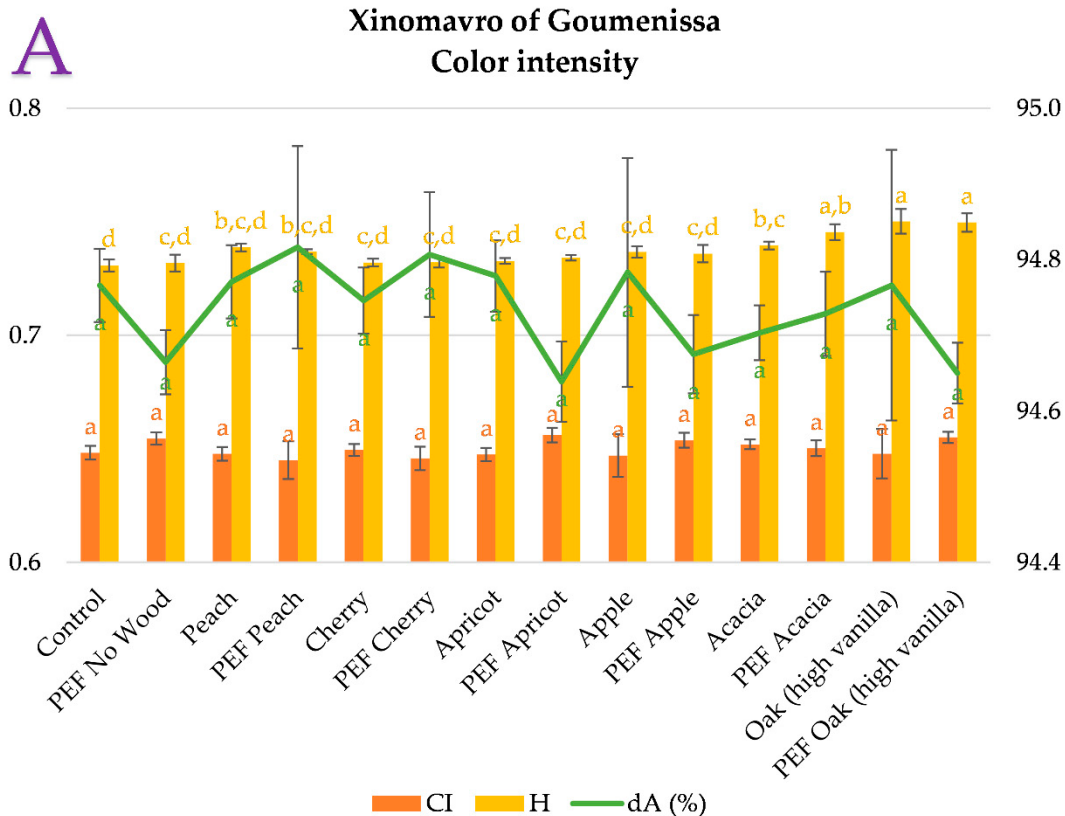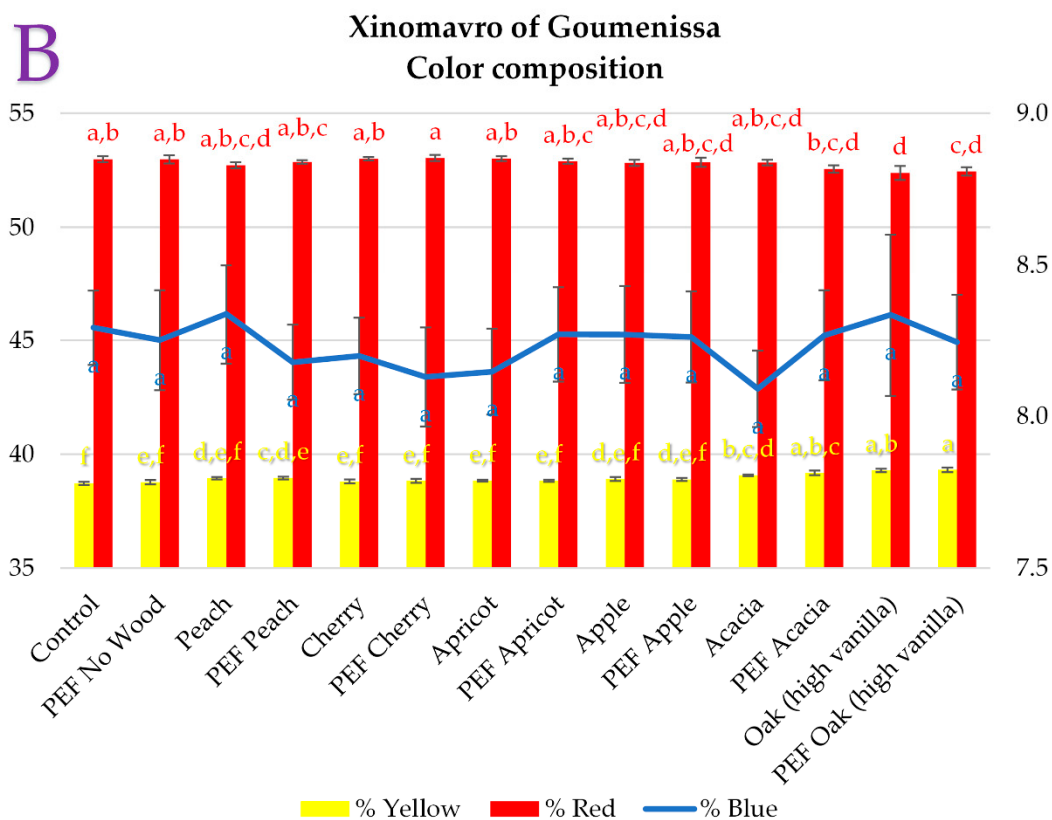

**Figure S3.** Goumenissa Xinomavro wine color intensity (CI), hue (H), and wine brilliance (dA, %) are displayed in plot A, and the color composition is presented in plot B. Values of bars are denoted on left axis and values of line are denoted on the right axis.

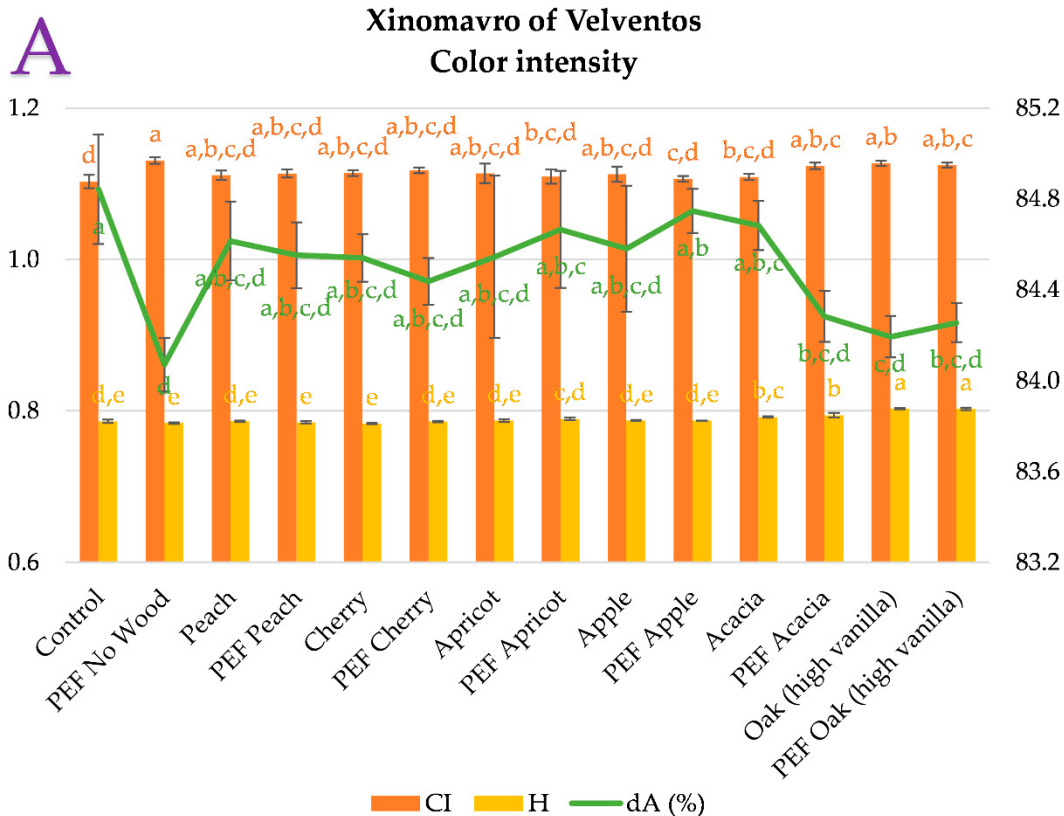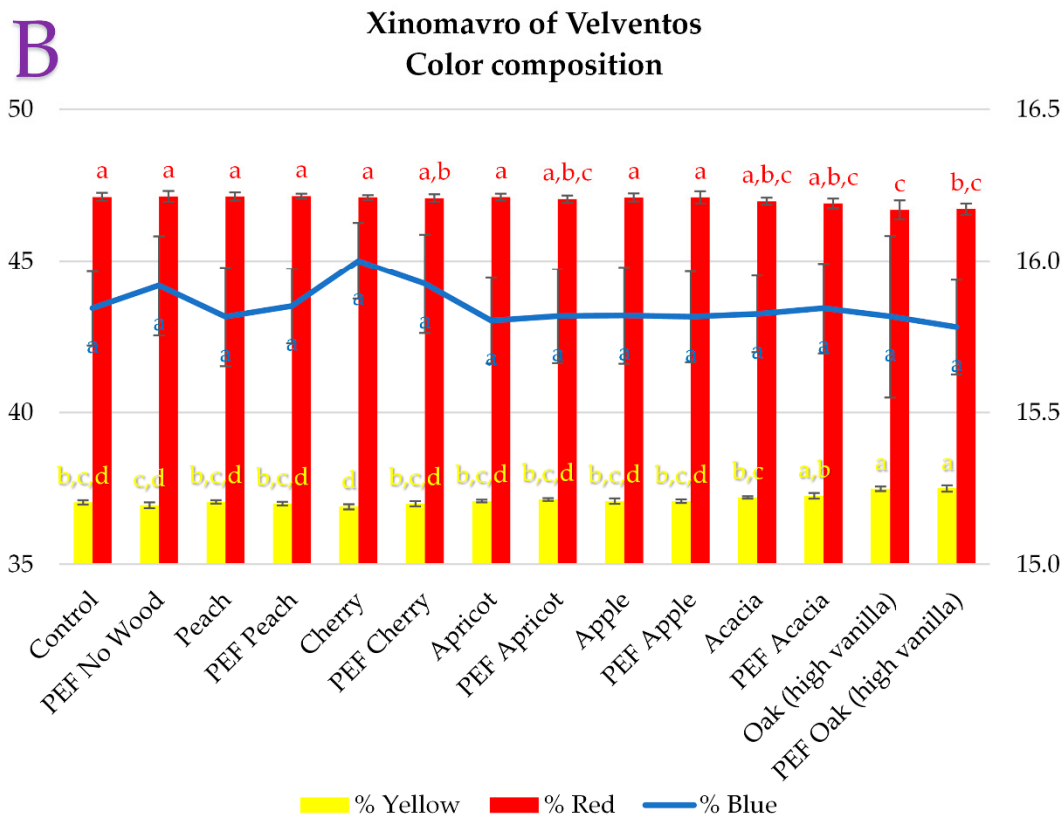

**Figure S4.** Velventos Xinomavro wine color intensity (CI), hue (H), and wine brilliance (dA, %) are displayed in plot A, and the color composition is presented in plot B. Values of bars are denoted on left axis and values of line are denoted on the right axis.
